# Supplementary material
Source: PubMed Central journal article supplement (PMC3243533)
Supplement: supp_M111.265439_jbc.M111.265439-1.pdf [file supp_M111.265439_jbc.M111.265439-1.pdf]

Supplementary Figure 1.

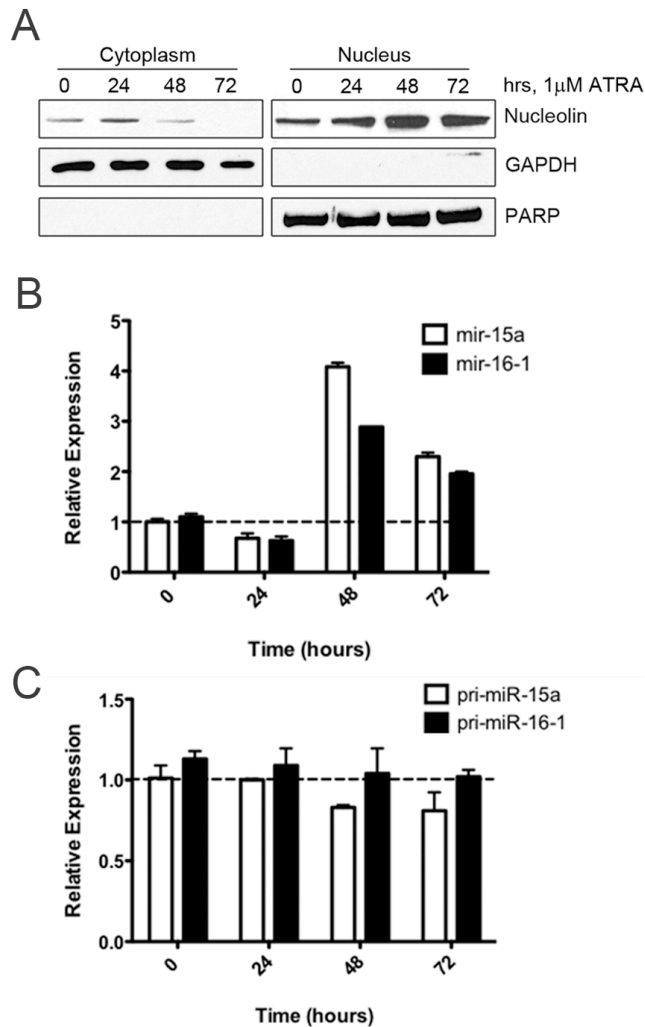

**Supplementary Figure 1. Treatment with all-*trans* retinoic acid (ATRA) induces nuclear localization of nucleolin and increased miRNA expression.**

A) HL-60 acute promyelocytic leukemia cells were treated with 1  $\mu$ M ATRA to decrease cytoplasmic localization of nucleolin and increase nuclear localization as described previously (25). B) Expression of mature miR-15a/16 in cells treated with ATRA closely correlates nucleolin localization. All points are normalized to DMSO-treated cells (dashed line). C) Primary miRNA expression shows no significant change in expression over time as determined by qRT-PCR normalized to DMSO-treated cells (dashed line).
